# Supplementary material for: Skill and independence weighting for multi-modelassessments
Source: Copernicus journal article supplement (doi:10.5194/gmd-2016-285), 2016-12-21
Supplement: Supplementary file [file gmd-2016-285-AC2-supplement.pdf]

1 Skill and independence weighting for multi-model  
2 assessments

3 Benjamin M. Sanderson<sup>\*1</sup>, Michael Wehner<sup>†2</sup>, and Reto Knutti<sup>‡3,1</sup>

4 <sup>1</sup>National Center for Atmospheric Research, Boulder CO, USA

5 <sup>2</sup>Lawrence Berkeley National Laboratory, CA, USA

6 <sup>3</sup>Institute for Atmospheric and Climate Science, ETH Zurich,  
7 Switzerland

8 March 2017

9 **1 Abstract**

10 We present a weighting strategy for use with the CMIP5 multi-model archive  
11 in the 4th National Climate Assessment which considers both skill in the cli-  
12 matological performance of models over North America as well as the inter-  
13 dependency of models arising from common parameterizations or tuning prac-  
14 tises. The method exploits information relating to the climatological mean state  
15 of a number of projection-relevant variables as well as metrics representing long  
16 term statistics of weather extremes. The weights, once computed can be used  
17 to simply compute weighted means and significance information from an ensem-  
18 ble containing multiple initial condition members from potentially co-dependent  
19 models of varying skill. Two parameters in the algorithm determine the degree  
20 to which model climatological skill and model uniqueness are rewarded; these  
21 parameters are explored and final values are defended for the Assessment. The  
22 influence of model weighting on projected temperature and precipitation changes  
23 is found to be moderate, partly due to a compensating effect between model skill  
24 and uniqueness. However, more aggressive skill weighting and weighting by tar-  
25 geted metrics is found to have a more significant effect on inferred ensemble  
26 confidence in future patterns of change for a given projection.

---

\*bsander@ucar.edu

†mfwehner@lbl.gov

‡reto.knutti@env.ethz.ch

## 27 **2 Introduction**

28 The CMIP5 archive [1] is the most comprehensive collection of climate simu-  
29 lations produced to date. The archive contains simulations from over 25 insti-  
30 tutions, some of which submit multiple models - bringing the total number of  
31 models in the archive to potentially more than 100 (although many of these are  
32 minor variants or initial condition members, and not all models conduct all ex-  
33 periments). Using this dataset to produce assessments of future climate change  
34 involves a number of conceptual challenges. Previous assessments of both the  
35 IPCC [2] and the National Climate Assessment in the United States [3] have  
36 considered the archive to represent model democracy [4], in that simulations of  
37 the future from each model are considered to be equally likely, without account-  
38 ing for any variation in model skill or for the fact that some models are very  
39 similar to other models in the archive, bringing into question the assumption  
40 that their simulations can be considered to be independent samples of future  
41 behavior.

42 These underlying assumptions have been challenged by a number of studies  
43 over recent years. Various studies [5, 6, 7, 8], have pointed out that the ensemble  
44 contains demonstrable inter-dependence, where similarities in the spatial  
45 biases in model simulations correspond well to expected relationships which one  
46 might expect from models from the same institution, or those sharing signifi-  
47 cant amounts of code. As such, the number of effective models in the archive  
48 is likely to be significantly smaller than the number of simulations [9, 10, 7].  
49 The weights should also be representative of the question at hand: skill is not a  
50 property of the model *per se*, but indicative of the ability of a model to project  
51 a certain change [11].

52 In addition, the models that are present in the archive are not equally skill-  
53 ful in representing the present day or past climate [12, 5]. A number of studies  
54 have attempted to weight models in a way which represents their skill alone;  
55 Bayesian Model Averaging [13] describes a set of approaches which collectively  
56 produce model weights which correspond to a posterior model probability rep-  
57 resenting truth given some data constraints. Giorgi and Mearns (2002) [14]  
58 proposed an ensemble averaging scheme which increased the weight of models  
59 which exhibited low observational biases but the method potentially discounts  
60 outlier projections [15]. However, these methods do not provide a mechanism  
61 for reducing the effect of model replication. An identical model submitted twice  
62 to the ensemble would still produce a different result - an issue which we ad-  
63 dress below. Furthermore, it is notably difficult to produce an overall ranking of  
64 model performance, given that the conclusion is conditional on both the region  
65 and metrics considered [16].

66 Some studies have suggested methodologies which might be able to address  
67 some of these complexities: Bishop and Abramowitz (2013) [17] proposed a  
68 method which produced a set of statistically independent meta models from the  
69 original archive, and applied this method to CMIP5 projections in Abramowitz  
70 and Bishop (2015) [18]. The technique calculates the optimal combination of  
71 models, such that a linear combination of models minimizes the error of a par-

72 ticular field against an observed target. While the bias of the combined product  
73 is by definition optimal, the coefficients of each model can be positive or nega-  
74 tive. With the view that negative weights are unphysical, the authors transform  
75 the original model output such that all weights are positive, and such that the  
76 variance of the ensemble is rescaled to equal the natural variability of the obser-  
77 vations themselves, with a solution that preserves the optimal combined model  
78 result from their initial regression.

79 While this ‘replicate Earth’ produces a product which significantly reduces  
80 the mean bias of the combined model product (a 30 percent reduction in RMSE  
81 compared to a simple multi-model mean [18]), there remain some issues of in-  
82 terpretation for the transformed ensemble members, which can no longer be  
83 directly interpreted as physical entities which conserve mass or energy. It is  
84 also not fully understood how the issue of independence of models in the origi-  
85 nal archive influences the results. And though the technique reduces errors in  
86 out-of-sample perfect model tests, the out-of-sample test presented in Bishop  
87 and Abramowitz (2013) [17] does not remove the effect of persistence of present  
88 day bias, which is directly solved-for in the regression - therefore not definitively  
89 demonstrating that prediction of future anomalies would be improved beyond  
90 the simple multi-model means for out-of-sample projections, which were not  
91 bias corrected.

92 In this study, we present a weighting scheme for use in the Climate Science  
93 Special Report (CSSR), which informs the 4th National Climate Assessment for  
94 the United States (NCA4). The requirements for this application are somewhat  
95 unique - in that a method from the literature cannot be simply taken ‘out of the  
96 box’ from an existing study. Traceability and simplicity are paramount for this  
97 application, where the derived weights are defined in this paper, but then form  
98 the basis of a number of varied analyses performed by the author team for the  
99 CSSR. Hence, the use of statistical meta-models as in Bishop and Abramowitz  
100 (2013) [17] would not be manageable because each individual application would  
101 have to be reconsidered in terms of the paradigm, where the details of statistical  
102 significance, model independence and individual model interpretation are not  
103 fully understood, and would be difficult to convey to the public audience for  
104 NCA4. As such, the request for the CSSR was to produce a single set of weights  
105 which reflected to some degree both model skill and model independence in the  
106 CMIP5 archive, which could be simply integrated into the existing workflow of  
107 the report.

108 Our methodology is based on the concepts outlined by Sanderson *et al* (2015)  
109 [7], a comparatively simple method for sub-sampling models the original archive,  
110 keeping models which were maximally independent and skillful in reproducing  
111 past climate. Another recent study [19] outlined an adaption of this approach for  
112 constraining a specific future change (future sea ice area, in that case). However,  
113 in this study, instead of deriving a subset or studying a single aspect of future  
114 change, the objective is to produce a single set of model weights which can  
115 be used to combine projections for a range of quantities into a weighted mean  
116 result, with significance estimates which also treat the weighting appropriately.

117 Ideally, the method would seek to have two fundamental characteristics.

Table 1: Observational Datasets used as observations.

| Field  | Description                             | Source             | Reference |
|--------|-----------------------------------------|--------------------|-----------|
| tas    | Surface Temperature (seasonal)          | Livneh, Hutchinson | [22, 22]  |
| pr     | Mean Precipitation (seasonal)           | Livneh, Hutchinson | [22, 22]  |
| rsut   | TOA Shortwave Flux (seasonal)           | CERES-EBAF         | [23]      |
| rlut   | TOA Longwave Flux (seasonal)            | CERES-EBAF         | [23]      |
| ta     | Vertical Temperature Profile (seasonal) | AIRS*              | [24]      |
| hur    | Vertical Humidity Profile (seasonal)    | AIRS               | [24]      |
| psl    | Surface Pressure (seasonal)             | ERA-40             | [25]      |
| tnn    | Coldest Night                           | Livneh, Hutchinson | [22, 22]  |
| txn    | Coldest Day                             | Livneh, Hutchinson | [22, 22]  |
| tnx    | Warmest Night                           | Livneh, Hutchinson | [22, 22]  |
| txx    | Warmest day                             | Livneh, Hutchinson | [22, 22]  |
| rx5day | seasonal max. 5-day total precip.       | Livneh, Hutchinson | [22, 22]  |

118 First, if a duplicate of one ensemble member is added to the archive, the resulting  
 119 mean and significance estimate for future change computed from the ensemble  
 120 should change as little as possible. Secondly, if a relatively poor (for the metrics  
 121 considered) model is added to the archive, the resulting mean and significance  
 122 estimates should also change as little as possible.

## 123 3 Method

### 124 3.1 Data pre-processing

125 Our analysis differs in a number of ways from that originally proposed by [7]

- 126 • The analysis region contains on the counterterminous United States (CONUS)  
 127 and most of Canada, constrained by available high resolution observations  
 128 of daily surface air temperature and precipitation.
- 129 • Inter-model distances are computed as simple root mean square differences  
 130 here, in contrast to the multi-variate PCA used by [7].
- 131 • The weights for skill and independence are the final product in this anal-  
 132 ysis, whereas they only inform the subset choice in the study by [7].

133 We utilize data for a number of mean state fields, and a number of fields which  
 134 represent extreme behaviour - these are listed in Table 1. All fields are masked to  
 135 only include information from the combined CONUS/Canada region. Extreme  
 136 indices are calculated using the ETCCDI protocols [20, 21]. We also consider a  
 137 selection of models from the CMIP5 archive, listed in Table 2.

### 138 3.2 Inter-model distance matrix

139 For each variable, a distance matrix  $\delta_v$  is computed between each pair of  $N$  total  
 140 models and between each model and the observed field (such that the observa-

Table 2: Submodel components for the 38 CMIP5 models considered in this study.

| Model          | Atmosphere       | Land       | Ocean       | Ice           | Source                                                                                                                                                                  |
|----------------|------------------|------------|-------------|---------------|-------------------------------------------------------------------------------------------------------------------------------------------------------------------------|
| NorESM1-ME     | CAM4             | CLM4       | MICOM-HAMOC | CICE          | <a href="https://verc.enes.org/ISENES2/models/earthsys-ems-models/ncc/noresm">https://verc.enes.org/ISENES2/models/earthsys-ems-models/ncc/noresm</a>                   |
| NorESM1-M      | CAM4             | CLM4       | MICOM-HAMOC | CICE          | <a href="https://verc.enes.org/ISENES2/models/earthsys-ems-models/ncc/noresm">https://verc.enes.org/ISENES2/models/earthsys-ems-models/ncc/noresm</a>                   |
| MRI-CGCM3      | MRI-AGCM3        | HAL        | MRI-COM3    |               | <a href="http://www.mri-jma.go.jp/Public/Technical/DATA/VOL_64/index-en.html">http://www.mri-jma.go.jp/Public/Technical/DATA/VOL_64/index-en.html</a>                   |
| MPI-ESM-LR     | ECHAM6           | JSBACH     | MPIOM       |               | <a href="http://www.mpi-met.mpg.de/en/science/models/mip-esm.html">http://www.mpi-met.mpg.de/en/science/models/mip-esm.html</a>                                         |
| MPI-ESM-LR     | ECHAM6           | JSBACH     | MPIOM       |               | <a href="https://www.enes.org/models/system-models/mip-m/mip-esm">https://www.enes.org/models/system-models/mip-m/mip-esm</a>                                           |
| MIROC4h        | FRCGC-AGCM       | MATSIRO    | CCSR-COCO   | Bitz/Lipscomb | <a href="http://journals.ametsoc.org/doi/full/10.1175/2010JCLI3679.1">http://journals.ametsoc.org/doi/full/10.1175/2010JCLI3679.1</a>                                   |
| MIROC-ESM-CHEM | FRCGC-AGCM       | MATSIRO    | CCSR-COCO   | Bitz/Lipscomb | <a href="http://www.wcrp-climate.org/wgcm/WGCM15/presentations/21Oct/KIMOTO_Japan.pdf">http://www.wcrp-climate.org/wgcm/WGCM15/presentations/21Oct/KIMOTO_Japan.pdf</a> |
| MIROC-ESM      | FRCGC-AGCM       | MATSIRO    | CCSR-COCO   | Bitz/Lipscomb | <a href="http://www.wcrp-climate.org/wgcm/WGCM15/presentations/21Oct/KIMOTO_Japan.pdf">http://www.wcrp-climate.org/wgcm/WGCM15/presentations/21Oct/KIMOTO_Japan.pdf</a> |
| IPSL-CM5B-LR   | LMDZ (CM4)       | ORCHIDEE   | NEMO-OPA    | NEMO-LIM      | <a href="https://cmc-ipsl.fr/index.php/cmcc-models/cmcc-ipsl-cm5">https://cmc-ipsl.fr/index.php/cmcc-models/cmcc-ipsl-cm5</a>                                           |
| IPSL-CM5A-LR   | LMDZ             | ORCHIDEE   | NEMO-OPA    | NEMO-LIM      | <a href="https://cmc-ipsl.fr/index.php/cmcc-models/cmcc-ipsl-cm5">https://cmc-ipsl.fr/index.php/cmcc-models/cmcc-ipsl-cm5</a>                                           |
| BCC-CSM1-1-M   | BCC-AGCM 2.1     | CLM3       | MOM4        | SIS           | <a href="http://link.springer.com/article/10.1007%2Fs13351-014-3041-7">http://link.springer.com/article/10.1007%2Fs13351-014-3041-7</a>                                 |
| BCC-CSM1-1-M   | BCC-AGCM 2.1     | CLM3       | MOM4        | SIS           | <a href="http://link.springer.com/article/10.1007%2Fs13351-014-3041-7">http://link.springer.com/article/10.1007%2Fs13351-014-3041-7</a>                                 |
| HadGEM2-ES     | HadGAM2 (N96L38) | TRIPFID    | HadGOM2     | GFDL SIS      | <a href="http://cms.ncas.ac.uk/wiki/UM/Configurations/HadGEM2">http://cms.ncas.ac.uk/wiki/UM/Configurations/HadGEM2</a>                                                 |
| HadGEM2-CC     | HadGAM2(N96L60)  | TRIPFID    | HadGOM2     | GFDL SIS      | <a href="http://cms.ncas.ac.uk/wiki/UM/Configurations/HadGEM2">http://cms.ncas.ac.uk/wiki/UM/Configurations/HadGEM2</a>                                                 |
| HadGEM2-AO     | HadGAM2 (N96L38) | MOSES2     | HadGOM2     | GFDL SIS      | <a href="http://cms.ncas.ac.uk/wiki/UM/Configurations/HadGEM2">http://cms.ncas.ac.uk/wiki/UM/Configurations/HadGEM2</a>                                                 |
| GISS-E2-R      | GISS             | GISS       | Russell     | Russell       | <a href="http://data.giss.nasa.gov/modelE/ar5/">http://data.giss.nasa.gov/modelE/ar5/</a>                                                                               |
| GISS-E2-H      | GISS             | GISS       | HYCOM       | HYCOM         | <a href="http://data.giss.nasa.gov/modelE/ar5/">http://data.giss.nasa.gov/modelE/ar5/</a>                                                                               |
| GFDL-ESM2M     | GFDL-AM2.1       | LM3        | MOM4.1      | SIS           | <a href="http://cms.ncas.ac.uk/wiki/UM/Configurations/HadGEM2">http://cms.ncas.ac.uk/wiki/UM/Configurations/HadGEM2</a>                                                 |
| GFDL-ESM2G     | GFDL-AM2.1       | LM3        | GOLD        | SIS           | <a href="http://www.gfdl.noaa.gov/earth-syst-ems-model">http://www.gfdl.noaa.gov/earth-syst-ems-model</a>                                                               |
| GFDL-CM3       | GFDL-AM3         | LM3        | MOM4.1      | SIS           | <a href="http://www.gfdl.noaa.gov/earth-syst-ems-model">http://www.gfdl.noaa.gov/earth-syst-ems-model</a>                                                               |
| FGOALS-g2      | GAMIL 2.0        | CLM3       | LICOM2      | CICE4.LASG    | <a href="http://links.springer.com/article/10.1007%2F800376-012-2140-6">http://links.springer.com/article/10.1007%2F800376-012-2140-6</a>                               |
| CanESM2        | AGCM4            | GLASS      | NCAR        |               | <a href="http://journals.ametsoc.org/doi/pdf/10.1175/JCLI-D-11-00715.1">http://journals.ametsoc.org/doi/pdf/10.1175/JCLI-D-11-00715.1</a>                               |
| CSIRO-Mk3-6-0  | Gordon           | CABLE      | MOM2.2      | SIS           | <a href="http://www.bom.gov.au/amoi/docs/2013/jeffrey_hres.pdf">http://www.bom.gov.au/amoi/docs/2013/jeffrey_hres.pdf</a>                                               |
| CNRM-CM5       | ARPEGE-Climate   | ISBA       | NEMO-OPA    | GELATO        | <a href="http://www.wcrp-climate.org/wgcm/WGCM16/Bellucci-CMCC.pdf">http://www.wcrp-climate.org/wgcm/WGCM16/Bellucci-CMCC.pdf</a>                                       |
| CMCC-CM5       | ECHAM5           | SILVA      | OPAS.2      | LIM           | <a href="http://www.cmcc.it/models/cmcc-cm">http://www.cmcc.it/models/cmcc-cm</a>                                                                                       |
| CMCC-CM5       | ECHAM5           | SILVA      | OPAS.2      | LIM           | <a href="http://www.cmcc.it/models/cmcc-cm">http://www.cmcc.it/models/cmcc-cm</a>                                                                                       |
| CMCC-CESM1     | ECHAM5           | SILVA      | OPAS.2      | LIM           | <a href="http://www.cmcc.it/models/cmcc-cm">http://www.cmcc.it/models/cmcc-cm</a>                                                                                       |
| GESM1-GAM5     | CAM5             | CLM4       | POP2        | CICE4         | <a href="https://www2.cesm.ucar.edu/models">https://www2.cesm.ucar.edu/models</a>                                                                                       |
| GESM1-FASTCHEM | CAM5             | CLM4       | POP2        | CICE4         | <a href="https://www2.cesm.ucar.edu/models">https://www2.cesm.ucar.edu/models</a>                                                                                       |
| CESM1-BGC      | CAM4             | CLM4       | POP2        | CICE4         | <a href="https://www2.cesm.ucar.edu/models">https://www2.cesm.ucar.edu/models</a>                                                                                       |
| CCSM4          | CAM4             | CLM4       | POP2        | CICE4         | <a href="https://www2.cesm.ucar.edu/models">https://www2.cesm.ucar.edu/models</a>                                                                                       |
| BNU-ESM        | CAM3.5           | CLM/BNU    | MOM4        | CICE4.1       | <a href="http://www.wcrp-climate.org/wgcm/WGCM15/presentations/21Oct/WANG_WGCM.pdf">http://www.wcrp-climate.org/wgcm/WGCM15/presentations/21Oct/WANG_WGCM.pdf</a>       |
| BCC-CSM1-1-M   | BCC-AGCM 2.1     | CLM3       | MOM4        | SIS           | <a href="http://link.springer.com/article/10.1007%2Fs13351-014-3041-7">http://link.springer.com/article/10.1007%2Fs13351-014-3041-7</a>                                 |
| BCC-CSM1-1-M   | BCC-AGCM 2.1     | CLM3       | MOM4        | SIS           | <a href="http://link.springer.com/article/10.1007%2Fs13351-014-3041-7">http://link.springer.com/article/10.1007%2Fs13351-014-3041-7</a>                                 |
| ACCESS1-3      | UKMO GAI.0       | CABLE v1.8 | MOM4.1      | GFDL SIS      | <a href="http://links.springer.com/article/10.1007%2Fs13351-014-3041-7">http://links.springer.com/article/10.1007%2Fs13351-014-3041-7</a>                               |
| ACCESS1-0      | HadGEM2 r1.1     | MOSES      | MOM4.1      | CICE4.1       | <a href="https://wiki.cesiro.au/display/ACCESS/Home">https://wiki.cesiro.au/display/ACCESS/Home</a>                                                                     |
|                |                  |            |             |               | <a href="http://www.cawcr.gov.au/publications/technicalreports/CTR-059.pdf">http://www.cawcr.gov.au/publications/technicalreports/CTR-059.pdf</a>                       |

141 tions are treated as an  $N + 1^{th}$  model). Data from each model is taken from the  
 142 first available initial condition member of each model’s historical contribution  
 143 to CMIP5. Data from years 1976-2005 are used from each model, averaging all  
 144 years to form a monthly climatology. Data from the observations are monthly  
 145 climatologies averaged from all available years within the 1976-2005 window.

146 Distances are evaluated as the area-weighted root mean square difference  
 147 over the domain. The matrix is then normalized by the mean inter-model dis-  
 148 tance, such that for each field in Table 1, there is a  $(n_{model} + 1)$  by  $(n_{model} + 1)$   
 149 matrix representing the pairwise distance between each model (and the obser-  
 150 vations).

151 These normalized matrices are then linearly combined, with each line in  
 152 Table 1 taking equal weight,

$$\delta = \sum_v \delta_v, \quad (1)$$

153 to produce the multi-variate distance matrix  $\delta$  illustrated in Figure 1.

### 154 3.3 Model Skill

155 The RMSE between observations and each model can be used to produce an  
 156 overall ranking for model simulations of the CONUS/Canada climate (which  
 157 is illustrated by the overall model-observation distance in Figure 1). Figure 2  
 158 shows how this metric is influenced by different component variables.

### 159 3.4 Independence weights

160 The inter-model distance matrix is also computed from the inter-model distance  
 161 matrix  $\delta$ . For a pair of models  $i$  and  $j$ , we first compute a similarity score  $S(\delta_{ij})$   
 162 from their pairwise distance  $\delta_{ij}$ :

$$S(\delta_{ij}) = e^{-\left(\frac{\delta_{ij}}{D_u}\right)^2}, \quad (2)$$

163 where  $D_u$  is the radius of similarity [7], which is a free parameter which  
 164 determines the distance scale over which models should be considered similar  
 165 (and thus down-weighted for co-dependence). We show below how an appro-  
 166 priate value can be chosen given prior knowledge about models with known  
 167 dependencies in the archive.

168 In limits, two identical models will produce a value of  $S(\delta_{ij})$  of 1, and  
 169  $S(\delta_{ij}) \rightarrow 0$  as  $\delta_{ij} \rightarrow \infty$ . A given model  $i$ ’s effective repetition  $R_u(i)$  can be  
 170 calculated by summing the models close by:

$$R_u(i) = 1 + \sum_{j \neq i}^n S(\delta_{ij}), \quad (3)$$

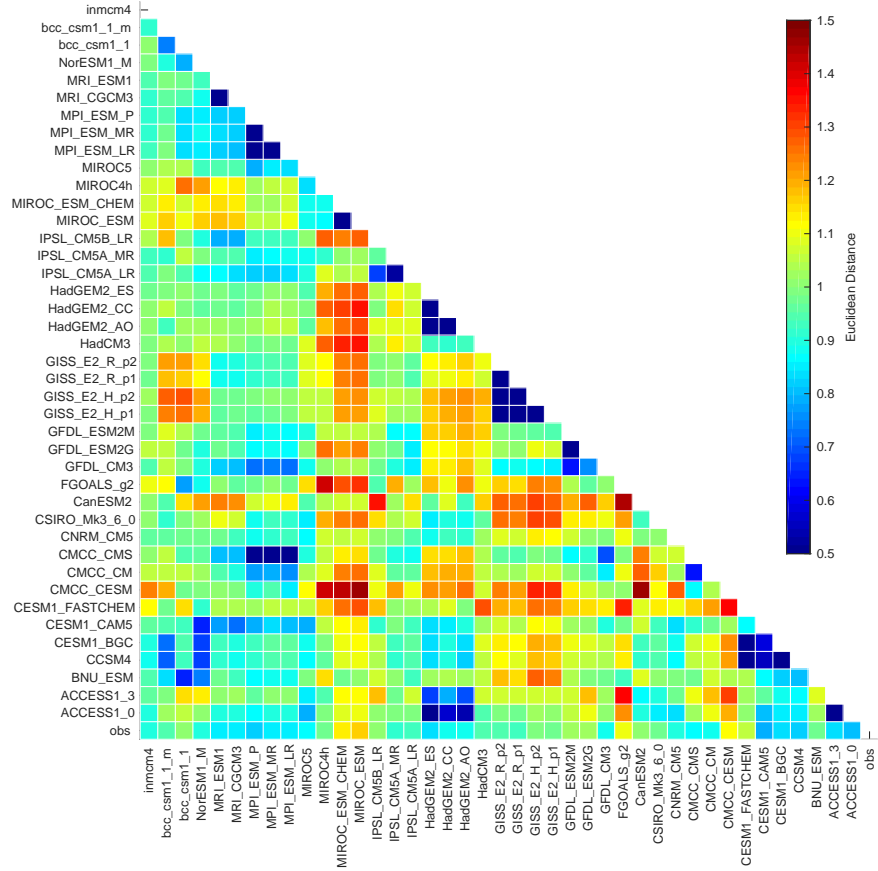

Figure 1: A graphical representation of the inter-model distance matrix for CMIP5 and a set of observed values. Each row and column represents a single climate model (or observation). All scores are aggregated over seasons (individual seasons are not shown). Each box represents a pair-wise distance, where warm colors indicate a greater distance. Distances are measured as a fraction of the mean inter-model distance in the CMIP5 ensemble. Smaller distances mean the datasets are in closer agreement than larger distances

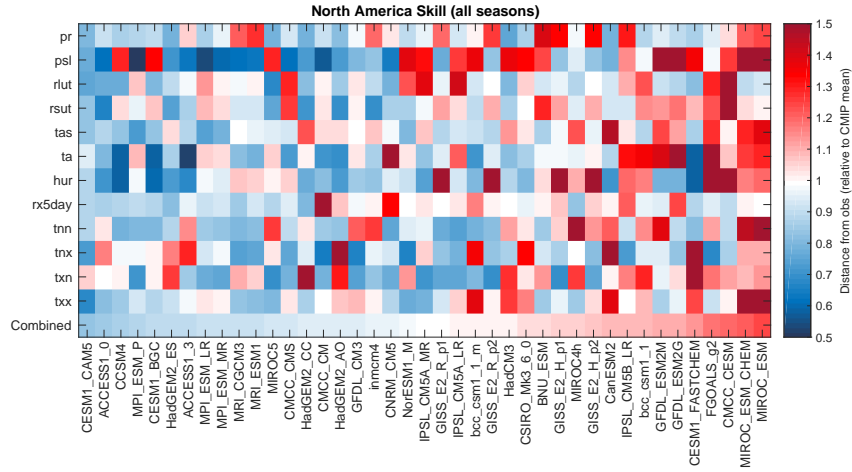

Figure 2: A graphical representation of the model-observation distance matrix for a number of variables, illustrating how different biases combine to produce the overall model-observation distance in Figure 1. Each column represents a single climate model, and rows represent the different observation types in Table 1. Distances along each row are normalized, such that the mean model has a distance of 1 to the observations. CMIP5 Models are sorted by their combined skill as shown in the bottom row.

171 where  $n$  is the total number of models. Finally, we calculate the indepen-  
 172 dence weight for model  $i$  as the inverse of its repetition:

$$w_u(i) = (R_u(i))^{-1}. \quad (4)$$

173 Figure 3 shows the dependence of the independence weights on  $D_u$  for a  
 174 number of different models.  $D_u$  is sampled by considering the distribution of  
 175 inter-model distances  $\delta$ , and sampling by percentiles  $\sigma_u$  the smallest inter-model  
 176 distances in the archive.

177 As points of reference, we consider some models from the archive known to  
 178 have no obvious duplicates (HadCM3 and INMCM), which should not be sig-  
 179 nificantly down-weighted by the method. We also consider some models where  
 180 there are numerous known closely related variants submitted from MIROC, MPI  
 181 and GISS. It is desirable to choose a value of  $D_u$  which produces a weight of  
 182 approximately  $1/n$  where  $n$  is the number of variants submitted.

183 Hence, by inspection of Figure 3, we take  $D_u$  as 0.48 times the distance  
 184 between the best performing model and observations in the CMIP5 archive,  
 185 which produces approximately the desired weighting characteristics in these  
 186 cases where we have a reasonable expectation of what the true model replication  
 187 is in the archive.

188 The methodology described above assumes each model has submitted only



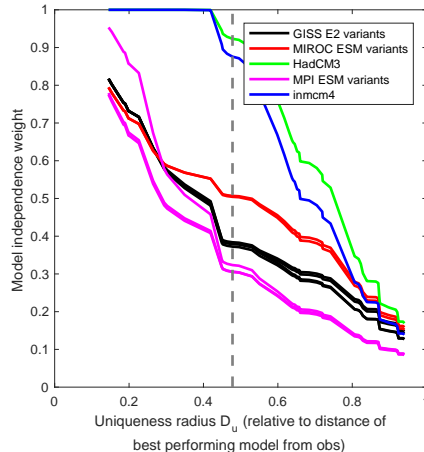

Figure 3: Model independence weights ( $w_u$ ) as a function of the radius of interdependence  $D_u$ , plotted for a number of models and groups of models in the CMIP5 archive. The vertical line shows the value used in the Climate Science Special Report.

189 one simulation to the archive, but the method is robust to the inclusion of  
 190 multiple initial condition members from each model. If  $D_u$  is chosen such that  
 191 structurally similar ensemble members are treated as duplicates, then  $w_u$  will  
 192 appropriately allocate a fractional weight to each initial condition ensemble  
 193 member. In the case of NCA4, extreme value statistics were only available  
 194 for a single instance of each model, hence initial condition ensembles were not  
 195 considered.

### 196 3.5 Skill weights

197 The RMSE distances between each model and the observations are used to  
 198 calculate skill weights for the ensemble. The skill weights represent the clima-  
 199 tological skill of each model in simulating the CONUS/Canada climate, both in  
 200 terms of mean climatology and extreme statistics. The skill weighting  $w_q(i)$  for  
 201 model  $i$  is calculated as in [7]:

$$w_q(i) = e^{-\left(\frac{\delta_{i(obs)}^{20c}}{D_q}\right)^2}, \quad (5)$$

202 where  $\delta_{i(obs)}^{20c}$  is the sum of the normalized RMSE differences over all variables,  
 203 between each model and the observations, and  $D_q$  is the radius of model quality  
 204 [7] which determines the degree to which models with a poor climatological  
 205 simulation should be downweighted. As such, a very small value of  $D_q$  will  
 206 allocate a large fraction of weight to the single best performing model in the

207 archive (as assessed by the climatological skill). Equally, as  $D_q \rightarrow \infty$ , the  
208 multi-model average will tend to the non skill-weighted solution.

209 An overall weight is then computed as the product of the skill weight and  
210 the independence weight.

$$w(i) = Aw_u(i)w_q(i), \quad (6)$$

211 where  $A$  is a normalization constant such that  $w(i)$  satisfies:

$$\sum_1^n w(i) = 1, \quad (7)$$

212 where  $n$  is the total number of models. We determine an appropriate value  
213 for  $D_q$  by considering both the skill of the weighted average in reproducing  
214 observations, and also by conducting perfect model simulations with the CMIP5  
215 ensemble. In Figure 4(a), we use the uniqueness parameter  $D_u$  determined  
216 in Section 3.4 and sample a range of  $D_q$ . The figure shows that the use of  
217 relatively strong weighting (where the  $D_q$  is approximately 40 percent of the  
218 distance between the best performing model and the observations) produces  
219 the weighted climatological average with the lowest in-sample error. However,  
220 in-sample score is not the only consideration.

221 A more skillful representation of the present-day state does not necessarily  
222 translate to a more skillful projection in the future. In order to assess whether  
223 our metrics improve the skill of future projections at all, we consider a perfect  
224 model test where a single model is withheld from the ensemble and then treated  
225 as truth.

226 However, such a test can be over-confident because when some models are  
227 treated as truth, there remain close relatives of that model in the archive which  
228 would be given a high skill weight and would inflate the apparent skill of the  
229 metric in predicting future climate evolution. To partly address this, we conduct  
230 our perfect model study with a subset of the CMIP5 archive which excludes  
231 obvious near relatives of the chosen ‘truth’ model. We achieve this by excluding  
232 any model which lies closer to the ‘truth’ model than the distance between the  
233 best performing model and the observations in the inter-model distance matrix  
234  $\delta$ . The excluded model pairs for the perfect model test are illustrated in Figure  
235 5.

236 Once the obvious duplicates have been removed for a given ‘perfect’ model  
237  $i$ , we can test the ability of the chosen multivariate climatological metrics to  
238 increase skill in the simulation of the out of sample model’s future. We do this  
239 in two ways: in the first case, we consider the RMSE of the weighted multi-model  
240 mean projection of each out of sample model’s projection of annual mean gridded  
241 temperature and precipitation change at the end of the 21st century under  
242 RCP8.5. This is expressed as a fraction of the RMSE one would obtain with a  
243 simple mean of the remaining models (again, excluding the obvious duplicates).  
244 This process is repeated for each model in the archive, after which the results

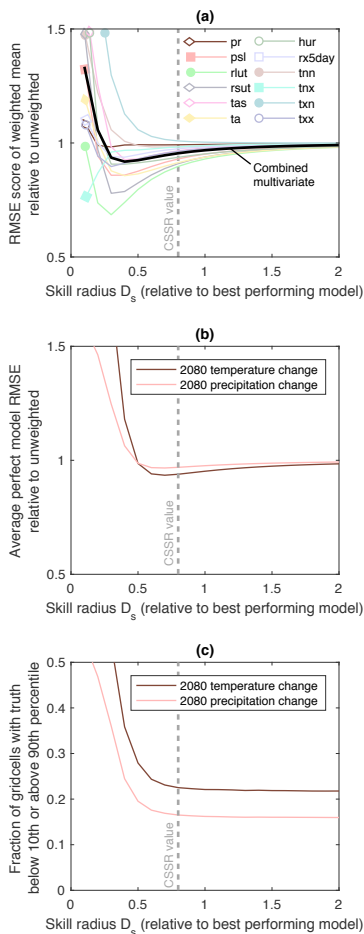

Figure 4: Subplots are functions of  $D_q$ , the radius of model quality (all figures take a value of  $D_u$  0.48 times the distance between the best performing model and observations in the CMIP5 archive, as selected in Figure 3). Subplot (a) shows the RMSE of the weighted multi-model mean compared with observations, relative to the non skill-weighted multi-model mean. The vertical dashed grey line indicates the value chosen for the Climate Science Special Report. Colored lines show RMSE values for individual variables, thick black line is the combined multivariate RMSE. Subplot (b) shows the average RMSE of future annual mean gridded temperature change projections in 2080-2100 (relative to 1980-2000) under RCP8.5 for an out-of-sample model taken to represent truth (with obvious replicates removed from the ensemble). Subplot (c) shows the average fraction of grid-cells for which the out-of sample ‘perfect model’ projections lie below the 10th or above the 90th percentile of the inferred weighted distribution.

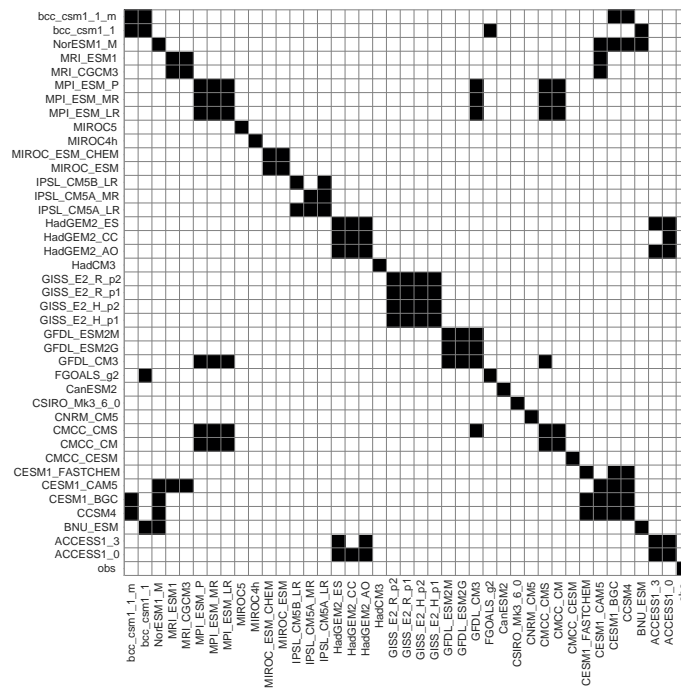

Figure 5: A graphical representation of models which are excluded from the remaining ensemble in the perfect model test when each model in turn is treated as truth. Cells in black represent models which are closer to each other than the best performing model in the archive is to observations.

245 are averaged and plotted in Figure 4(b), where the optimum value of  $D_q$  for the  
246 reproduction of future temperature and precipitation change is approximately  
247 70 percent of the distance between the best performing model and observations,  
248 for which there is a 9-10 percent reduction in RMSE compared the unweighted  
249 case. This suggests that in the perfect model study, some skill weighting based  
250 on climatological performance can improve the mean projection of future change.

251 Finally, we test whether skill-weighting the ensemble increases the chances  
252 of the truth lying outside of the distribution of projections suggested by the  
253 archive. For Figure 4(c), we consider the ensemble projected values for future  
254 temperature and precipitation at each gridcell, where  $D_q$  is allowed to vary and  
255  $D_u$  is kept at the value determined in Section 3.4. As in Figure 4(b), we consider  
256 each model in the CMIP5 archive as truth, each time removing near-neighbors  
257 from the remaining set (determined from Figure 5).

258 We allow the weighted model projected changes in 2080-2100 temperature  
259 or precipitation at each grid-cell to define a likelihood distribution for expected  
260 future change in the removed model. We then calculate the fraction of grid-  
261 cells where the chosen perfect model's actual projected value for temperature  
262 or precipitation change lies above the 90th or below the 10th percentile of the  
263 inferred likelihood distribution. If the likelihood distribution is representative  
264 of expected change for the removed 'perfect' model, one would expect a 20  
265 percent chance that the perfect model lies outside this range. However, if this  
266 value increases, it indicates that the weighting is too strong and the weighting  
267 is producing an under-dispersive distribution.

268 Figure 4(c) shows the average fraction of gridcells where the actual missing  
269 model projection is above the 90th, or below the 10th percentile of the inferred  
270 likelihood distribution, for a given value of  $D_q$ , where the average is taken over  
271 the entire CMIP5 ensemble. The figure shows that for values of  $D_q$  of less than  
272 80 percent of the distance between the best performing model and observations,  
273 there is some increased risk of the ensemble being under-dispersive. As such,  
274 Figures 4(a-c) together imply that  $D_q = 0.8$  is a justifiable, conservative value  
275 to use in the further analysis - there is still a demonstrable increase in the out-of-  
276 sample skill of the future projection in the perfect model tests, with a minimal  
277 risk of an under-dispersive distribution.

278 Using the values of  $D_q = 0.8$  and  $D_u = 0.48$  defended in this section, we  
279 illustrate skill, independence and combined weights for the CMIP5 archive in  
280 Figure 6 and in Table 3.

## 281 4 Gridded application

282 Once derived, the skill and independence weights can be used to produce weighted  
283 mean estimates of future change, as well as confidence estimates for those pro-  
284 jections. To illustrate this, we modify the significance methodology from the  
285 5th Assessment Report of the IPCC [2], such that:

- 286 • Stippling - large changes where the weighted multimodel average change is  
287 greater than double the standard deviation of the 20 year mean from con-

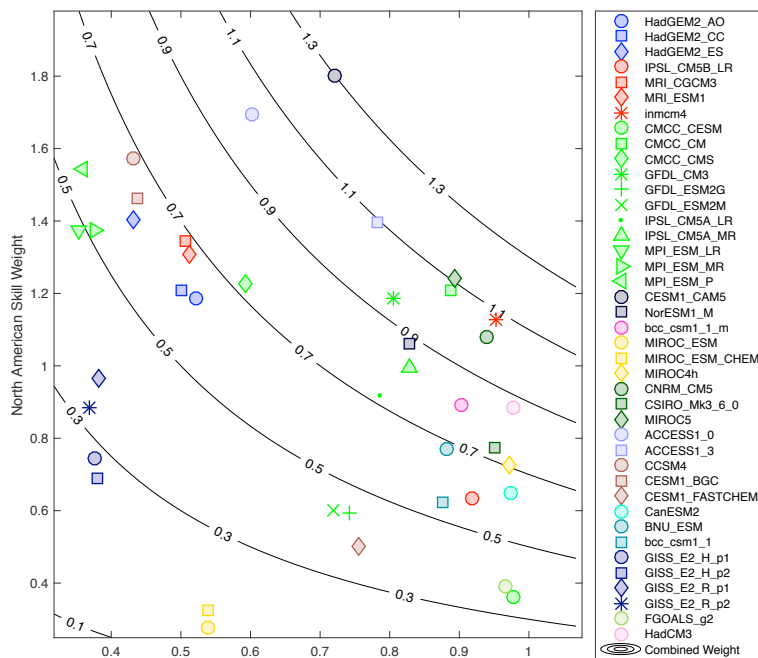

Figure 6: Model skill and independence weights for the CMIP-5 archive evaluated over the CONUS/Canada domain. Contours show the overall weighting, which is the product of the two individual weights.

|                | Uniqueness weight | Skill Weight | Combined |
|----------------|-------------------|--------------|----------|
| ACCESS1-0      | 0.60              | 1.69         | 1.02     |
| ACCESS1-3      | 0.78              | 1.40         | 1.09     |
| BNU-ESM        | 0.88              | 0.77         | 0.68     |
| CCSM4          | 0.43              | 1.57         | 0.68     |
| CESM1-BGC      | 0.44              | 1.46         | 0.64     |
| CESM1-CAM5     | 0.72              | 1.80         | 1.30     |
| CESM1-FASTCHEM | 0.76              | 0.50         | 0.38     |
| CMCC-CESM      | 0.98              | 0.36         | 0.35     |
| CMCC-CM        | 0.89              | 1.21         | 1.07     |
| CMCC-CMS       | 0.59              | 1.23         | 0.73     |
| CNRM-CM5       | 0.94              | 1.08         | 1.01     |
| CSIRO-Mk3-6-0  | 0.95              | 0.77         | 0.74     |
| CanESM2        | 0.97              | 0.65         | 0.63     |
| FGOALS-g2      | 0.97              | 0.39         | 0.38     |
| GFDL-CM3       | 0.81              | 1.18         | 0.95     |
| GFDL-ESM2G     | 0.74              | 0.59         | 0.44     |
| GFDL-ESM2M     | 0.72              | 0.60         | 0.43     |
| GISS-E2-H-p1   | 0.38              | 0.74         | 0.28     |
| GISS-E2-H-p2   | 0.38              | 0.69         | 0.26     |
| GISS-E2-R-p1   | 0.38              | 0.97         | 0.37     |
| GISS-E2-R-p2   | 0.37              | 0.89         | 0.33     |
| HadCM3         | 0.98              | 0.89         | 0.87     |
| HadGEM2-AO     | 0.52              | 1.19         | 0.62     |
| HadGEM2-CC     | 0.50              | 1.21         | 0.60     |
| HadGEM2-ES     | 0.43              | 1.40         | 0.61     |
| IPSL-CM5A-LR   | 0.79              | 0.92         | 0.72     |
| IPSL-CM5A-MR   | 0.83              | 0.99         | 0.82     |
| IPSL-CM5B-LR   | 0.92              | 0.63         | 0.58     |
| MIROC-ESM      | 0.54              | 0.28         | 0.15     |
| MIROC-ESM-CHEM | 0.54              | 0.32         | 0.17     |
| MIROC4h        | 0.97              | 0.73         | 0.71     |
| MIROC5         | 0.89              | 1.24         | 1.11     |
| MPI-ESM-LR     | 0.35              | 1.38         | 0.49     |
| MPI-ESM-MR     | 0.38              | 1.37         | 0.52     |
| MPI-ESM-P      | 0.36              | 1.54         | 0.56     |
| MRI-CGCM3      | 0.51              | 1.35         | 0.68     |
| MRI-ESM1       | 0.51              | 1.31         | 0.67     |
| NorESM1-M      | 0.83              | 1.06         | 0.88     |
| bcc-csm1-1     | 0.88              | 0.62         | 0.55     |
| bcc-csm1-1-m   | 0.90              | 0.89         | 0.80     |
| inmcm4         | 0.95              | 1.13         | 1.08     |

Table 3: Uniqueness, Skill and Combined weights for CMIP5 for the CONUS/Canada domain

288 trol simulations runs and 90 percent of the weight corresponds to changes  
289 of the same sign.

290 • Hatching - No significant change where the weighted multimodel average  
291 change is less than the standard deviation of the 20 year means from  
292 control simulations runs.

293 • Blanked out - Inconclusive where the weighted multimodel average change  
294 is greater than double the standard deviation of the 20 year mean from  
295 control runs and less than 90 percent of the weight corresponds to changes  
296 of the same sign.

297 The standard deviation of the 20 year mean from control simulations is de-  
298 rived using the ‘picontrol’ simulations in CMIP5. We consider all simulations  
299 with a length of 500 years or longer, and discard the first 100 years. The re-  
300 maining time period is broken into consecutive 20 year periods, and the estimate  
301 of control variability for each model is taken as the standard deviation of the  
302 20 year periods. This process is repeated for all models with an appropriate  
303 simulation. Finally, the standard deviations are averaged over all models to  
304 produce the final estimate for the standard deviation of the 20 year mean from  
305 the control simulations (note this differs slightly from [2], where the standard  
306 deviation for significance plots is taken as the square root of 2, multiplied by  
307 the control standard deviation).

308 In order to adapt this methodology to a weighted ensemble, we need to apply  
309 the weights both to the mean estimate and the significance estimates.

310 To calculate the weighted average, each model is associated with a weight  
311 (e.g. from table 3). The weights must be normalized, and the weighted average  
312  $p$  at each gridcell is:

$$p = \sum_1^n w(i)p(i) \quad (8)$$

313 where  $w(i)$  is the weight of model  $i$  and  $p(i)$  is the projected value from model  
314  $i$ .

315 Therefore, the significance test is very similar to the IPCC case: if the  
316 weighted average exceeds double the control standard deviation, it is a signifi-  
317 cant change and if it is less than the standard deviation it is not significant.

318 Sign agreement is slightly modified from the IPCC case - rather than as-  
319 sessing the number of models exhibiting the same sign of change, we consider  
320 the fraction of the weight exhibiting the same sign of change,  $f$ . This can be  
321 expressed as:

$$f = |1/n \sum_1^n w(i)\text{sign}(p(i))|, \quad (9)$$

322 for any given set of projections  $p$ .

323 We illustrate the application of this method to future projections of temper-  
324 ature and precipitation change under RCP8.5 in Figures 7 and 8 which show



325 the mean projected quantities as well as the 10th and 90th percentiles of the  
326 weighted distribution of change at the gridcell level. In both cases, the weighting  
327 has only a subtle effect on the mean projection, but serves to slightly constrain  
328 the range of response at a given gridcell. In Section 5, we discuss how more  
329 aggressive or targeted weighting can have a greater potential effect.

## 330 5 Sensitivity Studies

331 The parameter choices for  $D_q$  and  $D_u$  utilized in Section 3, as well as the  
332 choice of metrics and the domain were considered appropriate for the specific  
333 application of the US National Assessment, where it was desirable to have a  
334 single set of weights used for a number of applications. However, in a more  
335 general sense, we consider here how different choices may impact the results of  
336 weighted analyses, and how the researcher should consider weighting in more  
337 targeted (or more global) applications. We briefly consider the sensitivities of  
338 the method to different choices.

### 339 5.1 Spatial Domain

340 In the case of NCA4, the strategy was to produce multi-variate metrics which  
341 were specific to CONUS/Canada. However, there is an argument that there are  
342 aspects of non-local climatology which would ultimately impact the domain of  
343 interest (through their influence on global climate sensitivity, for example).

344 In Figure 9(a-e), we consider the RMSE metrics for both the US and the  
345 entire global domain. In this comparison, it is shown that there is a rela-  
346 tively poor correlation between model skill evaluated over CONUS/Canada and  
347 globally for any individual metric, however, when individual metrics are com-  
348 bined into a multivariate climate (the approach used in Section 3), there is a  
349 correlation of 0.89 between the regional and local metrics. As such, the final  
350 weighting for NCA4 would not be highly sensitive to using global rather than  
351 CONUS/Canada metrics, but a study using a more restrictive set of variables  
352 to assess model quality could potentially be sensitive to domain choice.

### 353 5.2 Skill weighting strength

354 The strength of the skill weighting corresponds to the parameter  $D_s$  in Section  
355 3. For the purpose of NCA4, a conservative value was chosen to minimize the  
356 potential for overconfidence in future projections from the weighted ensemble.  
357 This resulted in only very subtle changes in gridded temperature and precipita-  
358 tion projections for the future (although there are some noticeable differences  
359 in the uncertainty range, see Figures 7 and 8).

360 However, here we consider the impact on temperature projections if a more  
361 aggressive weighting strategy were used. In Figure 10(a), we show the sensitivity  
362 of global mean temperature change under RCP8.5 as a function of the skill  
363 radius. The default value of  $D_s = 0.8$  produces a small decrease in projected

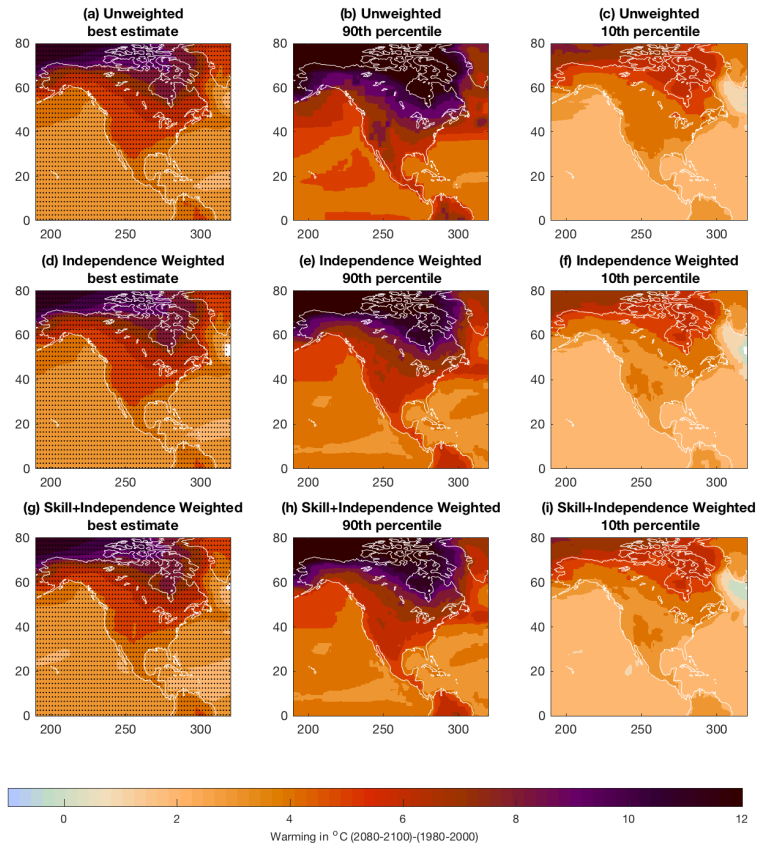

Figure 7: Projections of mean temperature change over CONUS/Canada in 2080-2100, relative to 1980-2000 under RCP8.5. (a-c) show the simple unweighted CMIP5 multi-model average, 90th percentile of warming and 10th percentile of warming using the significance methodology from [2], (d-f) show the weighted results as outlined in section 4 for models weighted by uniqueness only and (g-i) show weighted results for models weighted by both uniqueness and skill.

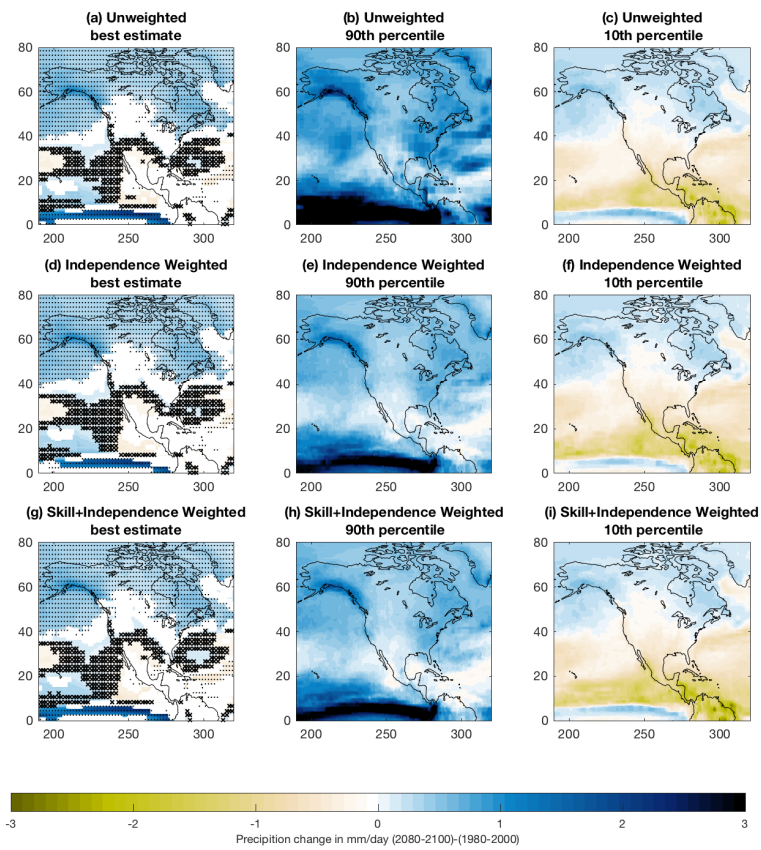

Figure 8: As for Figure 7, but for future mean precipitation change under RCP8.5.

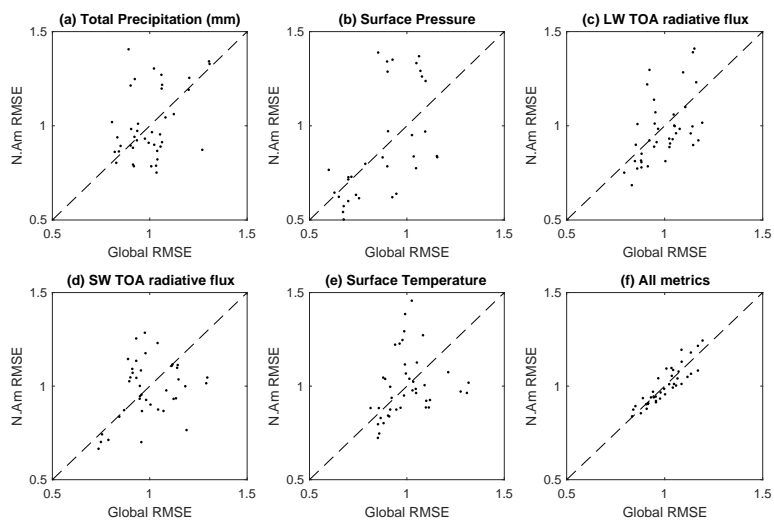

Figure 9: A series of plots showing Root Mean Square Errors evaluated over the CONUS/Canada domain as a function of errors assessed over the global domain. Each point corresponds to a single model in the CMIP5 archive. Plots are shown for some individual fields (a-e) and (f) RMSE averaged over all 12 available fields listed in Figure 2.

364 2080-2100 global mean temperature increase (a warming of 3.7K above 1980-  
365 2000 levels, compared to the non-skill weighted case of 3.9K, Figure 10(d)).

366 As  $D_s \rightarrow 0$ , the fraction of the percent of the models associated with 90  
367 percent of the weight decreases, and more weight is placed upon the models  
368 with higher combined skill scores in Figure 2. If a value of  $D_s = 0.4$  is used, 90  
369 percent of the model weight is allocated to just 40 percent of models, and the  
370 projected warming is decreased further to 3.45K (Figure 10(c)). However, if  $D_s$   
371 is reduced further to 0.1, such that 90 percent of weight is placed on only the  
372 top 5 percent of models (which corresponds to only 2 models: CESM1-CAM5  
373 and ACCESS1.0), the weighted warming estimate is higher than the unweighted  
374 case at 4.1K (Figure 10(b)).

375 Hence, we find that although a the skill weighting as used in NCA4 has only  
376 a subtle effect on projected temperatures compared to the unweighted case,  
377 there is a demonstrable effect when stronger weights are utilized, but there  
378 is an increased risk of the weighted ensemble being underdispersive (Figure  
379 4(c)). For very aggressive weighting, projections differ significantly from the  
380 unweighted case but the resulting projection is effectively governed by only the  
381 best performing few models. Such aggressive weighting in the perfect model test  
382 was found to result in a less skillful projection (Figure 4(b)).

### 383 5.3 Univariate weighting

384 The requirements for NCA4 were such that a single set of weights should be  
385 used for the entire report. However, for some application it might be desirable  
386 to tailor a set of weights to optimally represent a particular process or projec-  
387 tion. Here, we consider how using weights assessed on precipitation climatology  
388 alone could change the result of the projection. The precipitation weighted case  
389 is formulated identically to the multivariate case but distances are computed us-  
390 ing RMS differences over the mean precipitation field (over the CONUS/Canada  
391 domain) only; the selection of  $D_s$  is set to 0.8 times the distance of the best per-  
392 forming model, and  $D_u$  is taken the 1.5th percentile of the inter-model distance  
393 distribution as in the multivariate case.

394 Figure 11(a) shows the distribution of changes in annual mean grid-level  
395 precipitation for the late 21st century under RCP8.5. It is notable that there is  
396 negligible difference between the mean precipitation changes in the unweighted  
397 case and the multi-variate weighted case, but in the precipitation only case there  
398 is an increase in regions exhibiting a large drying trend. This implies that a  
399 multivariate metric has little constraint on precipitation change, but a more  
400 targeted metric could potentially identify regions which might exhibit extreme  
401 drying in the future (just as each individual model exhibits some regions of  
402 extreme drying, but the lack of agreement amongst models on where those  
403 regions are causes the multi-model mean to lack any such behavior, as noted in  
404 Knutti *et al* (2010) [26]).

405 We can illustrate this behavior by considering the spatial pattern of precip-  
406 itation change in the three cases, using unweighted(Figure 11(b)), multivariate  
407 weighted (Figure 11(c) as in Figure 8) or weighted using only the climatolog-

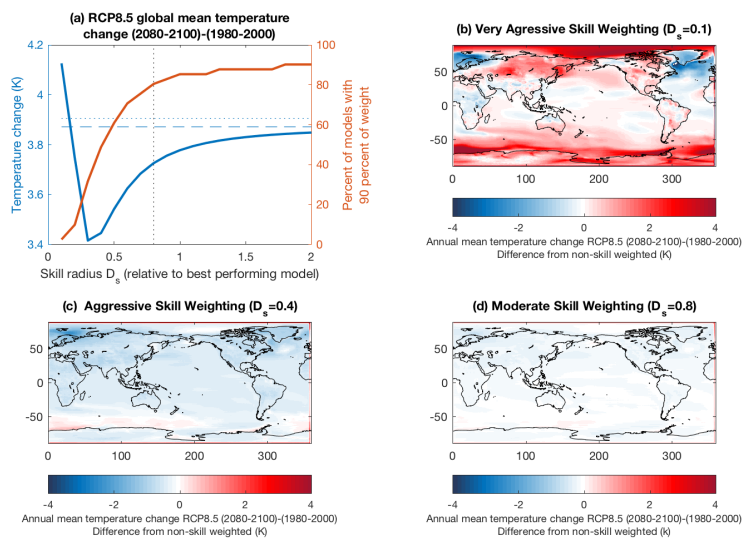

Figure 10: A plot showing the effect of skill weighting strength on global temperature projections. Subplot (a) shows global mean temperature increase for 2080-2100 under RCP8.5 as a function of the skill radius  $D_s$  (blue curve), as well as the fraction of models with 90 percent of the allocated weight (red curve). Subplots (b-d) show projected mean temperature maps for 3 cases of  $D_s=0.1$  (b), 0.4 (c) and 0.8 (d).

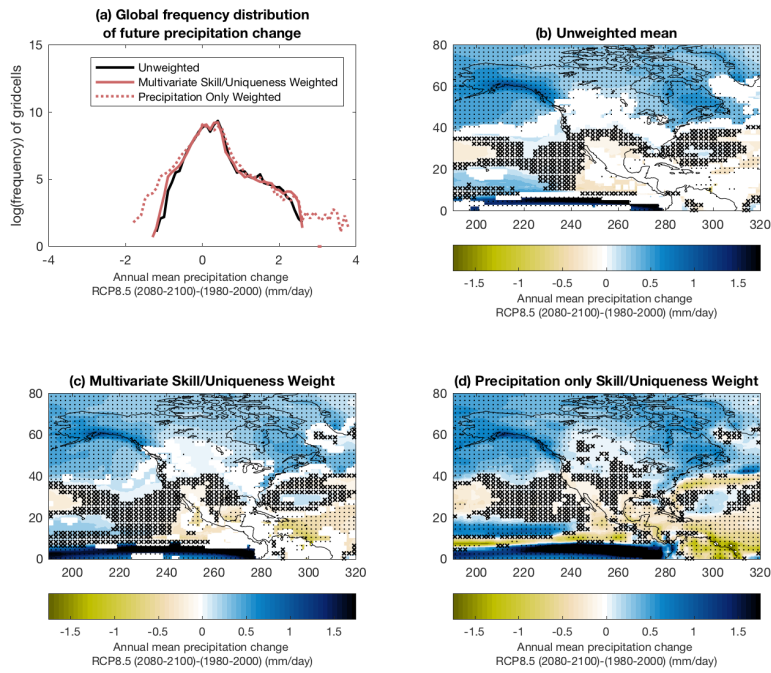

Figure 11: Distribution of changes in annual mean grid-level precipitation for the late 21st century under RCP8.5. (a) shows the distribution for the mean (black) or weighted by all variables (red solid) and weighted by precipitation only (red dotted) projection of annual precipitation under RCP8.5. (b-d) show maps of precipitation change in the style of Figure 8 for each weighting case.

408 ical precipitation only (Figure 11(d)). In the unweighted case, large fractions  
409 of the continental US show disagreement in the sign of precipitation change.  
410 Much of the midwest, northwest and southwest Canada for example are colored  
411 white indicating that models disagree on the sign of change, and drying in the  
412 southwest is not significant. A multivariate weighting makes little difference to  
413 annual mean precipitation projections in North America. However, the seasonal  
414 mean precipitation projections presented in the CCSR (not shown here) differ  
415 substantially from those presented in the Third US National Climate Assess-  
416 ment during the winter and spring [27]. In those seasons, the stippled regions  
417 of decreased precipitation deemed confident to be large in the Southwest US  
418 are decreased in area by weighting. Furthermore, the southern edge of the  
419 region stippled increases is moved Northward. Summer and fall precipitation  
420 changes are largely deemed to be small compared to natural variability in both  
421 assessments and are hatched as described above.

422 A precipitation-based metric, however, seems to make a noticeable difference  
423 to the confidence associated with the weighted projection. There is now clear  
424 and significant increases in precipitation in the northern part of the US, and  
425 significant increases in the northeast. There is also more clearly defined drying  
426 along the west coast and significant drying over the northern Amazon which  
427 was not evident in the unweighted or multivariate case.

428 Hence, it seems that there is potential to constrain the spatial patterns of  
429 fields which show significant spatial heterogeneity across the multi-model archive  
430 by considering targeted metrics which might be more directly informative to rel-  
431 evant processes for that particular projection. One must be cautious as noted in  
432 Section 5.1, because individual metrics are more susceptible to domain choices  
433 than the multivariate case, and so such a targeted constraint must be thor-  
434 oughly investigated before application in a general assessment. However, this is  
435 a potential line of investigation which would be worthy of future study.

## 436 6 Summary and Discussion

437 This study has discussed a potential framework for weighting models in a struc-  
438 turally diverse ensemble of climate model projections, accounting for both model  
439 skill and independence. The parameters of the weighting in this case were op-  
440 timized for using the CMIP5 ensemble for the Climate Science Special Report  
441 (CSSR) to inform the fourth National Climate Assessment for the United States  
442 (NCA4); an application which required a weighting strategy targeted towards  
443 a particular region (CONUS/Canada), with a single set of weights which could  
444 be applied to a diverse range of projections.

445 The solution proposed in this study adapted the idea first discussed in the  
446 context of model sub-selection in Sanderson et al (2015) [7], and applied it  
447 to a continuous general weighting scheme (in contrast to the sea-ice specific  
448 weighting scheme outlined in [19]). Weights were formulated on the basis of  
449 skill and uniqueness, where skill was assessed by considering the climatological  
450 bias averaged over a diverse set of variables, and uniqueness was assessed by



451 constructing an inter-model distance matrix from the same set of variables and  
452 down-weighting models which lie in each others' immediate vicinity.

453 It should be noted that although our likelihood weighting function is empiri-  
454 cal, the functional form satisfies in a simple way the required parameters of the  
455 weighting scheme. Though the structure of this functional form is not funda-  
456 mental, it can simply be shown to have some useful features. The technique is  
457 presented in this paper in a form which maximises clarity and reproducibility,  
458 but its effect can be described in Bayesian language. The total model weight  
459 is the posterior likelihood of a given model representing truth. Each model's  
460 prior probability of representing truth is given by its independence weighting,  
461 and the likelihood function is defined for the multivariate dataset using an as-  
462 sumed Gaussian likelihood profile in a space defined by the the sum of the  
463 normalized RMSE differences over all variables between each model and the  
464 observations. However, the application in this paper is for a simple weighting  
465 scheme only and it is left to further study to formally implement such concepts  
466 in a Bayesian framework.

467 The method provides a single set of weights constructed for NCA4, using  
468 a multi-variate climatological skill metric and a limited domain size. Two pa-  
469 rameters must be determined for the weighting algorithm; a radius of model  
470 skill and one of similarity. The former was calibrated by considering a perfect  
471 model test where a single model is treated as truth and its historical simulation  
472 output is treated as observations, immediate neighbors of the test model are  
473 removed from the archive and the remaining models are used to conduct tests  
474 which assess skill in reconstructing past and future model performance, as well  
475 as assessing the risk of producing an underdispersive ensemble which fails to  
476 encompass the perfect future projection at a given grid point. Using these three  
477 tests, we take a conservative choice for model weighting which minimizes the  
478 risk of under-dispersion (i.e. the risk that the real world might lie outside the  
479 entire weighted distribution of projections at a given gridpoint).

480 The similarity parameter is calculated in a qualitative fashion by considering  
481 cases where models are known to be relatively unique, or where there is a known  
482 set of closely related models. The parameter is adjusted such that the known  
483 unique models are given a weight of near unity, and the models with  $n$  near-  
484 identical versions are each given a weight of approximately  $1/n$ .

485 The requirements of a large assessment places constraints on the choice of  
486 parameters for this analysis. Logistical considerations imply that only one set  
487 of weights can be constructed, and the broad readership and high stakes of the  
488 assessment mean that any risk of under-dispersion of projected future climate is  
489 unacceptable for this application. These constraints dictate that only a moder-  
490 ate weighting of model skill is used, where 90 percent of the weight is allocated  
491 to 80 percent of models. This, unsurprisingly, creates only a modest change in  
492 mean projected results and only a small reduction in uncertainty. A stronger  
493 skill weighting is shown to have a more significant effect on projected changes,  
494 but with the risk of increased under-dispersion.

495 In addition, there exists a weak trade-off between model skill and model  
496 uniqueness in the CMIP5 ensemble; models which are demonstrably high per-

497 forming also tend to be the ones with the most near replicates in the archive. As  
498 such, there is a compensating effect of the skill and uniqueness components of  
499 the weighting algorithm, which tends to mute the effect of the overall weighting  
500 when compared to the unweighted case. In other words, the unweighted CMIP5  
501 ensemble is in fact already a skill weighted ensemble to some degree.

502 However, although this tradeoff is evident in the CMIP5 archive, there is  
503 no guarantee that such a tradeoff is a justification for using an unweighted  
504 average in future versions of the CMIP archive. A single, highly replicated  
505 but climatologically poor model present in a future version of the archive could  
506 significantly bias the simple multi-model mean of a climatological projection. As  
507 such, it is desirable to have a known and tested weighting algorithm in place to  
508 produce robust projections in the case of highly replicated, or very poor models.

509 Beyond the single set of weights produced for NCA4, the basic structure  
510 outlined in this study can be used to produce a more targeted weighting for  
511 a particular projection (as was conducted for sea ice projections in [19]). Our  
512 provisional results suggest that targeted weights could potentially yield more  
513 confidence in projections if only a limited set of relevant projections are included,  
514 especially in fields where projections exhibit high degrees of structural diversity  
515 within the archive. This tailored weighting approach, however, presents risks  
516 which necessitate further study - our sensitivity studies suggest that multi-  
517 variate metrics are more robust to changes in spatial domain than targeted  
518 metrics, and the exact choice of metrics which should be used to best constrain  
519 a particular projection is not a trivial matter.

520 With this in mind, we propose that future studies should further investi-  
521 gate how selection of physically relevant variables and domains should be used  
522 to optimally weight projections of future climate change, and that individual  
523 projections will need careful consideration of relevant processes in order to for-  
524 mulate such metrics. Confidence in such weighting approaches is highest if there  
525 are well understood underlying processes that explain why the chosen metric  
526 constrains the projection. Until then, we have presented a provisional and con-  
527 servative framework which allows for a comprehensive assessment of model skill  
528 and uniqueness from the output of a multimodel archive when constructing  
529 combined projections from that archive. In so doing, we come to the reassuring  
530 conclusion that for this particular application (i.e., domain and variables)  
531 the results which would be inferred from treating each member of the CMIP5  
532 as an independent realization of a possible future are not significantly altered  
533 by our weighting approach although the localized details of confidence in the  
534 magnitude of precipitation changes may be affected. However, by establishing  
535 a framework, we make the first tentative steps away from simple model democ-  
536 racy in a climate projection assessment, leaving behind a strategy which is not  
537 robust to highly unphysical or highly replicated models of our future climate.

## 538 7 Code availability

539 Complete MATLAB code for the analysis conducted in this manuscript is pro-  
540 vided. All CMIP5 data used in this analysis is downloadable from the Earth  
541 System Grid (<https://pcmdi.llnl.gov/projects/esgf-llnl/>).

## 542 References

- 543 [1] Karl E Taylor, Ronald J Stouffer, and Gerald A Meehl. An overview of  
544 CMIP5 and the experiment design. *Bulletin of the American Meteorological*  
545 *Society*, 93(4):485, 2012.
- 546 [2] IPCC Climate Change. The physical science basis. Contribution of working  
547 group I to the fifth assessment report of the intergovernmental panel on  
548 climate change. *K., Tignor, M., Allen, SK, Boschung, J., Nauels, A., Xia,*  
549 *Y., Bex, V., Midgley, PM, Eds*, page 1535, 2013.
- 550 [3] Jerry M Melillo, Terese TC Richmond, and GW Yohe. Climate change  
551 impacts in the United States. *Third National Climate Assessment*, 2014.
- 552 [4] Reto Knutti. The end of model democracy? *Climatic Change*, 102(3-4):  
553 395–404, 2010.
- 554 [5] Reto Knutti, David Masson, and Andrew Gettelman. Climate model ge-  
555 nealogy: Generation CMIP5 and how we got there. *Geophysical Research*  
556 *Letters*, 40(6):1194–1199, 2013.
- 557 [6] David Masson and Reto Knutti. Climate model genealogy. *Geophysical*  
558 *Research Letters*, 38(8), 2011.
- 559 [7] Benjamin M Sanderson, Reto Knutti, and Peter Caldwell. A representative  
560 democracy to reduce interdependency in a multimodel ensemble. *Journal*  
561 *of Climate*, 28(13):5171–5194, 2015.
- 562 [8] Christopher Pennell and Thomas Reichler. On the effective number of  
563 climate models. *Journal of Climate*, 24(9):2358–2367, 2011.
- 564 [9] JD Annan and JC Hargreaves. Understanding the CMIP3 multimodel  
565 ensemble. *Journal of Climate*, 24(16):4529–4538, 2011.
- 566 [10] Benjamin M Sanderson and Reto Knutti. On the interpretation of con-  
567 strained climate model ensembles. *Geophysical Research Letters*, 39(16),  
568 2012.
- 569 [11] Wendy S Parker. Confirmation and adequacy-for-Purpose in Climate Mod-  
570 elling. In *Aristotelian Society Supplementary Volume*, volume 83, pages  
571 233–249. The Oxford University Press, 2009.

- 572 [12] Hugo G Hidalgo and Eric J Alfaro. Skill of CMIP5 climate models in  
573 reproducing 20th century basic climate features in Central America. *Inter-*  
574 *national Journal of Climatology*, 35(12):3397–3421, 2015.
- 575 [13] Jennifer A Hoeting, David Madigan, Adrian E Raftery, and Chris T Volin-  
576 sky. Bayesian model averaging: a tutorial. *Statistical science*, pages 382–  
577 401, 1999.
- 578 [14] Filippo Giorgi and Linda O Mearns. Calculation of average, uncertainty  
579 range, and reliability of regional climate changes from aogcm simulations  
580 via the “reliability ensemble averaging” (rea) method. *Journal of Climate*,  
581 15(10):1141–1158, 2002.
- 582 [15] Claudia Tebaldi and Reto Knutti. The use of the multi-model ensemble in  
583 probabilistic climate projections. *Philosophical Transactions of the Royal*  
584 *Society of London A: Mathematical, Physical and Engineering Sciences*,  
585 365(1857):2053–2075, 2007.
- 586 [16] Core Writing Team. Good practice guidance paper on assessing and com-  
587 bining multi model climate projections. In *IPCC Expert meeting on as-*  
588 *sessing and combining multi model climate projections*, page 1, 2010.
- 589 [17] Craig H Bishop and Gab Abramowitz. Climate model dependence and the  
590 replicate earth paradigm. *Climate dynamics*, 41(3-4):885–900, 2013.
- 591 [18] G Abramowitz and CH Bishop. Climate model dependence and the ensem-  
592 ble dependence transformation of cmip projections. *Journal of Climate*, 28  
593 (6):2332–2348, 2015.
- 594 [19] Reto Knutti, Jan Sedláček, Benjamin M Sanderson, Ruth Lorenz, Erich M  
595 Fischer, and Veronika Eyring. A climate model projection weighting scheme  
596 accounting for performance and interdependence. *Geophysical Research*  
597 *Letters*, 44(4):1909–1918, 2017.
- 598 [20] Lisa Alexander, Markus Donat, Yoichi Takayama, and Hongang Yang. The  
599 climdex project: creation of long-term global gridded products for the anal-  
600 ysis of temperature and precipitation extremes. In *WCRP Open Science*  
601 *conference, Denver*, 2011.
- 602 [21] J Sillmann, VV Kharin, FW Zwiers, X Zhang, and D Bronaugh. Climate  
603 extremes indices in the cmip5 multimodel ensemble: Part 2. future climate  
604 projections. *Journal of Geophysical Research: Atmospheres*, 118(6):2473–  
605 2493, 2013.
- 606 [22] Michael F Hutchinson, Dan W McKenney, Kevin Lawrence, John H Ped-  
607 lar, Ron F Hopkinson, Ewa Milewska, and Pia Papadopol. Development  
608 and testing of Canada-wide interpolated spatial models of daily minimum-  
609 maximum temperature and precipitation for 1961-2003. *Journal of Applied*  
610 *Meteorology and Climatology*, 48(4):725–741, 2009.

- 611 [23] NASA. CERES EBAF Data Sets. *Available online*, 2011. URL  
612 [http://eosweb.larc.nasa.gov/PRODOCS/ceres/level4\\_ebaf\\_table.html](http://eosweb.larc.nasa.gov/PRODOCS/ceres/level4_ebaf_table.html).
- 613 [24] Hartmut H Aumann, Moustafa T Chahine, Catherine Gautier, Mitchell D  
614 Goldberg, Eugenia Kalnay, Larry M McMillin, Hank Revercomb, Philip W  
615 Rosenkranz, William L Smith, David H Staelin, et al. AIRS/AMSU/HSB  
616 on the Aqua Mission: Design, Science Objectives, Data Products, and  
617 Processing Systems. *IEEE TRANSACTIONS ON GEOSCIENCE AND*  
618 *REMOTE SENSING*, 41(2):253, 2003.
- 619 [25] Sakari M Uppala, PW Kållberg, AJ Simmons, U Andrae, V d Bechtold,  
620 M Fiorino, JK Gibson, J Haseler, A Hernandez, GA Kelly, et al. The ERA-  
621 40 re-analysis. *Quarterly Journal of the Royal Meteorological Society*, 131  
622 (612):2961–3012, 2005.
- 623 [26] Reto Knutti, Reinhard Furrer, Claudia Tebaldi, Jan Cermak, and Gerald A  
624 Meehl. Challenges in combining projections from multiple climate models.  
625 *Journal of Climate*, 23(10):2739–2758, 2010.
- 626 [27] John Walsh, Donald Wuebbles, Katherine Hayhoe, James Kossin, Kenneth  
627 Kunkel, Graeme Stephens, Peter Thorne, Russell Vose, Michael Wehner,  
628 Josh Willis, et al. Our changing climate. *Climate change impacts in the*  
629 *United States: the third national climate assessment*. Washington, DC: US  
630 *Global Change Research Program*, 2014.
